# Supplementary material for: Toolkit for Population Health Initiatives Around the Globe Related to Collaborative Comprehensive Medication Management for Children and Youth
Source: MDPI journal article supplement (doi:10.3390/children6040057), 2019-04-08
Supplement: s1 [file s1]

**Table 1. Evidence of expectation for key clinical pharmacist practice activities in each continent [8].**

| <b>Expected activity in North American clinical practice</b>                                                                                                                                            | <b>Africa</b> | <b>Asia</b> | <b>Europe</b> | <b>Oceania</b> | <b>South America</b> |
|---------------------------------------------------------------------------------------------------------------------------------------------------------------------------------------------------------|---------------|-------------|---------------|----------------|----------------------|
| Assesses the status of the patient's health problems and determine whether the prescribed medications are optimally meeting the patient's needs and goals of care                                       | +             | +           | +++           | +++            | +                    |
| Evaluates the appropriateness and effectiveness of the patient's medications                                                                                                                            | +             | +           | ++            | +++            | +                    |
| Recognizes untreated health problems that could be improved or resolved with appropriate medication therapy                                                                                             |               |             | ++            | +++            |                      |
| Follows the patient's progress to determine the effects of the patient's medications on his or her health                                                                                               |               |             | ++            | +++            |                      |
| Consults with the patient's physicians and other health care providers in selecting the medication therapy that best meets the patient's needs and contributes effectively to the overall therapy goals | +             | +           | +++           | +++            | +                    |
| Advises the patient on how to best take his or her medications                                                                                                                                          | +++           | +++         | +++           | +++            | +++                  |
| Supports the health care team's efforts to educate the patient on other important steps to improve or maintain health, such as exercise, diet, and preventive steps like immunization                   |               |             | ++            | +++            |                      |
| Refers the patient to his or her physician or other health professionals to address specific health, wellness, or social services concerns as they arise                                                |               |             | +++           | +++            |                      |

Key: + = developing expectation on the continent; ++ = published expectation on the continent; +++ = established expectation on the continent
